# Supplementary material
Source: publisher figshare collection journal article supplement (https://gsapubs.figshare.com/articles/dataset/_/15079002)
Supplement: Supplementary file 1 [file 1]

This Supplemental Material accompanies Turner, S., and Berta, A., 2021, Illustrating the unknowable: Women paleoartists who drew ancient vertebrates, in Clary, R.M., Rosenberg, G.D., and Evans, D.C., eds., The Evolution of Paleontological Art: Geological Society of America Memoir 218, [https://doi.org/10.1130/2021.1218\(21\)](https://doi.org/10.1130/2021.1218(21)).

TABLE S2. SELECTION OF 20TH- TO 21ST-CENTURY WOMEN PALEOARTISTS

| Name                                  | Dates        | Date/Place of publication      | Style                         | Associations                                           | Reference                                                                                                                    |
|---------------------------------------|--------------|--------------------------------|-------------------------------|--------------------------------------------------------|------------------------------------------------------------------------------------------------------------------------------|
| Lindsey Morris Sterling               | 1876–1931    | 1901–1930s                     | 2D/3D                         | AMNH<br>H.F. Osborn                                    | <i>Natural History</i> 1925 cover                                                                                            |
| Erna Pinner                           | 1890/93–1987 | 1933–1950                      | Jonathon Cape, London         | Kasimir Edschmid<br>Exile from Germany                 | Children’s e.g., Swinton and Pinner, 1948. <i>The Corridor of Life</i>                                                       |
| Louise Waller Germann                 | 1896–1957    | 1940s–50s                      | 2D b/w drawings               | Edwin H. Colbert<br>AMNH                               | Colbert (1951) <i>The Dinosaur Book</i>                                                                                      |
| Margret Joy Flinsch Buba              | 1904–1998    | 1920s–1940s                    | 2D b/w drawings               | AMNH<br>H.F. Osborn                                    | Osborn (1929) titanotheres                                                                                                   |
| Elizabeth ‘Lisa’ Rungius (Mrsn) Fulda | 1878–19xx?   | fl. 1920s–1958<br>USA          | photography, 2D b/w drawings  | AMNH<br>H.F. Osborn                                    | Osborn (1929) titanotheres; Gallencamp (2001); Cohen (2015)                                                                  |
| Helen Haywood                         | 1908–1995    | 1970s England                  | 2D Skin Color                 |                                                        | e.g., Hayward 1964, 1965, 1970 <i>My Book of Prehistoric Creatures</i>                                                       |
| Lois Darling                          | 1917–1989    | 1955–1977<br>USA               | 2D AMNH artist                | Edwin H. Colbert                                       | Colbert (1955, 1968); own e.g., Darling and Darling (1959, 1960)                                                             |
| Margaret Matthew-Colbert              | 1911–2007    | 1930s–1990s<br>USA             | 2D/3D AMNH artist & sculpture | Edwin H. Colbert<br>Miriam Schlein                     | Books & museum displays, e.g. 1984 New Mexico Natural History (NMNH) museum mural (Elliott, 2000)                            |
| Maidi Wiebe                           | 1922–1998    | 1950s–1960s                    | 2D, 3D, color                 | Robert Denison                                         | FMNH models, dinosaur books, exhibits (Hazebourg, 2020)                                                                      |
| Ely Kish                              | 1924–2018    | 1950s<br>USA/Canada            | 2D                            | Exile from Germany<br>Edwin H. Colbert<br>Dale Russell | Colbert <i>Dinosaurs: An illustrated history</i> ; Toronto Museum; <i>Odyssey in Time: Dinosaurs of North America</i> (1989) |
| Lieslelote Finke                      | 1925–2019    | 1940s on Germany               | 2D                            |                                                        | Lescaze (2017)                                                                                                               |
| Jenny Middleton Halstead              | 1942–English | 1960s–1990s<br>England         | 2D drawings, watercolor       | L. Beverly Halstead                                    | Books, posters e.g., Halstead and Halstead (1982)                                                                            |
| Margaret Lambert                      | English      | 1960s–2000s<br>England, Africa | 2D b/w drawings               | Elaine Anderson & Bjorn Kurten                         | <i>Cave Bear Story, Pleistocene Mammals; Before the Indians, First Land Mammals</i>                                          |
| Elisabeth Daynes                      | 1960–French  | France, Croatia                | 3D sculpture                  | European museums                                       | Hominid sculptures                                                                                                           |
| Elisabeth ‘Elisa’ D. Trimby           | English      | 1977 England                   | 2D b/w & color                | Conan Doyle                                            | Folio Society <i>The Lost World</i> (Conan Doyle, 1912)                                                                      |
| Sylvia Massey Czerkas                 | American     | 1980s USA                      | 2D, 3D?                       | Stephen Czerkas                                        | Books, museum dinosaur exhibits (Hazebourg, 2020)                                                                            |

|                                    |                     |                 |                   |                                 |                                                            |
|------------------------------------|---------------------|-----------------|-------------------|---------------------------------|------------------------------------------------------------|
| Donna Braginetz                    | American            | 1990s USA       | 2D color          |                                 | Dinosaurs e.g. Horner (1994) dinosaurs                     |
| Robyn Muche                        | S. African          | 1990s           | 2D color          | Mary E. White; FB               | Children's books e.g., White, 1990                         |
| Ivy Rutzky                         | American            | 1990s USA       | 2D color          | AMNH                            | Maisey (1996) fossil fish reconstructions                  |
| Luci Betti-Nash                    | American            | 2000s on, USA   | 2D color          | SVP journals                    | Mesozoic mammals, amphibians e.g., SVP Memoir 14 cover     |
| Louise Waller                      | 196/7?–<br>American | 1990s USA       | 2D color          | NMNH mural                      | Elliott (2000, p. 119); Colbert and Morales (2001)         |
| Carol Abraczinskas                 | American            | 2000s USA       | 2D                | Paul Sereno                     | Scientific publications Lazendorf Prize                    |
| Christine Lanham &<br>Bronwyn Reed | Australian          | Australia       | 2D color          | Canowindra                      | Devonian fish kill; Loomes et al. (2005)                   |
| Raven Amos                         | American            | 2010s           | 2D color          |                                 | Witton (2017)                                              |
| Karen Carr                         | American            | 2000s USA       | Digital 2D color  | Louis Jacobs                    | Book, mural at Forth Worth Museum of Science and History   |
| Danielle Dufault                   | Canadian            | 2010s Canada    | 2D color          | Royal Ontario<br>Museum Toronto | Paintings, underwater scenes, fish                         |
| Rebecca Groom                      | American            | 2010s           | 3D color          |                                 | Toys, e.g., Witton (2017)                                  |
| Jennifer Hall                      | American            | 2010s           | 2D color          |                                 | Museum displays, scientific papers, taxidermy (Diep, 2017) |
| Tess Kissinger                     | American            | 2000s           | 2D                |                                 | Lazendorf Prize, e.g., Scotchmoor et al. (2003)            |
| Mary Parrish &<br>Allison Michas   | American            | 1980s–2010s     | 2D                | USNM                            | 2005 Paleoart website; museum displays                     |
| Sheila Moxley                      | British             | 2000s           | 2D color          | FB                              | Children's: Anholt (2006) on Mary Anning                   |
| Anne Musser                        | American            | 2000s Australia | 2D color          | Australian<br>museums           | Clode, 2009 Megafauna                                      |
| April Isch Neander                 | American            | 2000s           | Digital           | Z. Luo, Chicago                 | Lazendorf Prize                                            |
| Ai-Juan Shi                        | Chinese             | 2010s           | 2D digital        | IVPP Beijing                    |                                                            |
| Esther van Hulsen                  | American            | 2010s           | 2D color          | FB                              | Underwater scenes                                          |
| Emma Willoughby                    | American            | 2010s           | 2D drawing, color | FB                              | Scientific papers, books, museum display, Witton (2017)    |
| Karen L. Wright                    | American            | 2001            | 2D b/w drawings   | Charles<br>Gallenkamp           | Gallencamp (2001)a                                         |

See more in Berta and Turner (2020); information from living artists with permission or published sources.

## Acknowledgments

We thank Don Wolberg for his help with American paleoartists of note.

## References not in main text

Anholt, L., 2006, *Stone Girl Bone Girl: The Story of Mary Anning*: New York, Frances Lincoln Publishers, 32 p.

Carr, K. *Dinosaur Hunt*. HarperCollins

Clode, D., 2009, Prehistoric Giants. The Megafauna of Australia: Melbourne, Nature Series. Museum Victoria, 72 p.

Cohen, E.D., 2015, The history of life on Earth. The Work and Life of Elizabeth Fulda: The College Hill Independent, April 10, <https://www.theindy.org/596> (accessed 31 May 2020).

Colbert, E.H., 1951, The Dinosaur Book: New York, McGraw-Hill & AMNH, 156 p.

Colbert, E.H., Morales, M., and Minkoff, E.C., 2001, Evolution of the Vertebrates: A History of the Backboned Animals Through Time: New York, Wiley-Liss, 560 p.

Conan Doyle, A., 1912, The Lost World: 1977 Edtn. London, The Folio Society, 195 p.

Czerkas, S., and Czerkas, S., 1989, My Life with the Dinosaurs: New York, Pocket Books, Simon & Schuster, 106 p.

Darling, L. and Darling, L., 1959, Before and After Dinosaurs: New York, William Morrow & Co., 95 p.

Darling, L., and Darling, L., 1960, 60 million Years of Horses: New York, William Morrow & Co., 64 p.

Diep, F., 2017, How do you make a living, paleoartist? Pacific Standard Original: Apr 6, 2015 Updated: Jun 14, 2017 - <https://psmag.com/economics/she-supplements-it-with-taxidermy> (accessed 31 Dec. 2019).

Gallenkamp, C., 2001, Dragon Hunter Roy Chapman Andrews and the Central Asiatic Expeditions: New York, Viking with AMNH, Penguin Group, 344 p.

Grasley, E., 2018, Paleoart: Painting the Land Before Time: April 25, <https://www.youtube.com/watch?v=buWdVFHYLnI> (accessed June 2020).

- Halstead, B., and Halstead, J., 1982, A Brontosaur. The life story unearthed: London, William Collins Ltd, 32 p.
- Hazebourg, N., 2020, Vintage dinosaur art: *what is a dinosaur* – parts 1, 2: <http://chasmosaurs.com/tag/maidi-wiebe/>  
 April 16<sup>th</sup> (accessed 25 May).
- Haywood, H., 1964, The Days of the Dinosaurs: London, Odhams.
- Haywood, H., 1965, Exploring Fossils: London, Odhams.
- Horner, J.R., 1994, Digging Dinosaurs. The search that unraveled the mystery of baby dinosaurs: New York, Perennial Library, Harper & Row, 210 p.
- Jacobs, L., 1995, Lone Star Dinosaurs: Chicago, Ivan R. Dee, 160 p.
- Kurtén, B., 1976, The Cave Bear Story. Life and death of a vanished animal: New York, Columbia University Press, 163p.
- Loomes, M., with Dagg, T., Lanham, C. and Reed, B., 2005, Long Ago but not so far away or What Ossi didn't Know!: Canowindra, NSW, The Age of Fishes Museum Inc., unpaginated.
- Maisey, J.G., 1996, Discovering Fossil Fishes: New York, Henry Holt Inc., 223 p.
- Osborn, H.F., 1929, The titanotheres of ancient Wyoming, Dakota, and Nebraska: Washington, DC, Monographs of the United States Geological Survey, v. 55, 701 p + plates.

Place, R., 1969, First Land Mammals: London, Ginn, p.

Russell, D., and Kish, E., 1989, Odyssey in Time: Dinosaurs of North America: London, Natural History Museum & TSO, 256 p.

Swinton, W.E., and Pinner, E., 1948, The Corridor of Life: London, Jonathon Cape, 323 p.

White, M.E., 1990, *Muttaburrasaurus*: An Australian dinosaur in its time and space, illustrated by Robyn Muche: Knoxfield, Vic.: Houghton Mifflin Australia, 31 p.

Other sources: Facebook (FB), Society of Vertebrate Paleontology News Bulletins (SVP), Wiki internet

<http://www.daynes.com/en/biography-elisabeth-daynes.html> - accessed Sept. 30 2019

See more artists on <http://www.gnsi.science-art.com/2007MT/bios.shtml>.
