# Supplementary material
Source: publisher figshare collection journal article supplement (https://gsapubs.figshare.com/articles/dataset/_/15079002)
Supplement: Supplementary file 2 [file 1]

This Supplemental Material accompanies Turner, S., and Berta, A., 2021, Illustrating the unknowable: Women paleoartists who drew ancient vertebrates, *in* Clary, R.M., Rosenberg, G.D., and Evans, D.C., eds., The Evolution of Paleontological Art: Geological Society of America Memoir 218, [https://doi.org/10.1130/2021.1218\(21\)](https://doi.org/10.1130/2021.1218(21)).

TABLE S1. NOTABLE PIONEERS IN 19TH-CENTURY PALEOART

| Name                                                                                                                       | Dates         | Publication/place Date          | Style                             | Associations                                                        | Reference                                                                                                                      |
|----------------------------------------------------------------------------------------------------------------------------|---------------|---------------------------------|-----------------------------------|---------------------------------------------------------------------|--------------------------------------------------------------------------------------------------------------------------------|
| Emma Parkinson                                                                                                             | 1788–1867     | 1841 England                    | Watercolorist of drawings         | James Parkinson, father                                             | In 1811 <i>Organic Remains</i> ; reprinted in Mantell's 1850 <i>Pictorial Atlas</i> – first VP book in English; pls LXIX–LXXIV |
| Mary Ann Woodhouse                                                                                                         | 1795–1869     | 1820s–1830s England             | 2D watercolors, drawings          | Gideon Mantell husband                                              | Geology of Sussex, <i>Iguanodon</i> teeth *                                                                                    |
| Eliza Gordon Cumming                                                                                                       | 1795/? – 1842 | 1842                            | 2D drawings                       | Roderick Murchison                                                  | Devonian fish ‘fanciful creatures’ Kölbl-Ebert, 2007)                                                                          |
| Orra White Hitchcock                                                                                                       | 1796–1863     | 1841 Massachusetts, USA         | 2D Black & White (B/W) drawings   | Edward Hitchcock, husband                                           | Dinosaur footprints, fish fossils (Aldrich, 1982; Marché, 1991) *                                                              |
| Mary Morland Buckland                                                                                                      | 1797–1857     | 1823–1836 England, France       | 2D B/W drawings                   | Georges Cuvier, William Buckland                                    | Illustrated bones for Cuvier and Buckland (Kölbl-Ebert, 1997) *                                                                |
| Margaret Hobson (née Adamson)                                                                                              | 179x?–184x?   | 1847 Australia                  | 2D B/W drawing                    | Edmund Hobson husband                                               | Illustrated <i>Diprotodon</i> jaw (see Berta & Turner, 2020)                                                                   |
| Mary Ann Anning                                                                                                            | 1799–1847     | e.g., 1839 Lyme Regis England   | 2D B/W & color drawings           | self-taught                                                         | Reconstructions of her own fossils – fish, reptiles *                                                                          |
| Cecilie Braun Agassiz                                                                                                      | 1809–1848     | 1833–1844 Neuchâtel Switzerland | 2D drawings, watercolor?          | Louis Agassiz husband 1 <sup>st</sup> wife                          | Color plates in <i>Recherches sur les Poissons Fossiles</i> ; (Guyot, 1878)                                                    |
| Graceanna Lewis                                                                                                            | 1821–1912     | 1876 Philadelphia USA           | 2D drawing?                       | Exhibition                                                          | <i>Dimetrodon</i> (Aldrich, 1982) *                                                                                            |
| Phoebe Traquair                                                                                                            | 1852–1936     | 1880s–1914 Edinburgh Scotland   | 2D Trained in art drawings, stone | Ramsay Heatley Traquair husband                                     | Scientific publications (see Berta and Turner, 2020)                                                                           |
| Miss (unknown first name) Suft                                                                                             | Fl. 1880s     | 1883, London                    | B/W drawings                      | Arabella Buckley* Macmillan                                         | <i>Winners in Life's Race</i> - fossils in life scenes                                                                         |
| Gertrude Mary Woodward                                                                                                     | 1854–1939     | numerous 1900–1930s BMNH London | B/W drawings                      | Daughter of Henry B. Woodward                                       | Many scientific papers; Smith Woodward works including <i>Catalogue of Fossil Fishes</i>                                       |
| Cecelia Beaux                                                                                                              | 1855–1942     | 1875                            | 2D B/W drawings                   | artist of note                                                      | For E. Drinker Cope <i>The Vertebrata of the Cretaceous Formations of the West</i>                                             |
| Ellen Caroline Woodward                                                                                                    | 1859–1943     | BMNH London                     | 2D /W drawings                    | Daughter of Henry B. Woodward; work for BMNH; J.W. Davis & Traquair | Scientific papers; menu for Richard Owen's retirement dinner; Women's Guild of Artists                                         |
| Alice Bolingbroke Woodward                                                                                                 | 1862–1951     | numerous BMNH, books, magazines | B2D /W drawings, scenes           | Daughter of Henry Woodward Rev. Hutchinson                          | <i>Illustrated London News</i> ; book illustration, postcards; Women's Guild of Artists (Beare, 1999, 2012)                    |
| Harriet Huntsman                                                                                                           | 1850–1938?    | Kansas Geological Survey        | 2D b/w drawings                   | USA for GS                                                          | Drawings dinosaur bones (Aldrich, 1982)                                                                                        |
| Note (sources: * Ogilvie and Harvie, 2000, table modified from Turner et al., 2010; Berta and Turner, 2020, and see below) |               |                                 |                                   |                                                                     |                                                                                                                                |

## REFERENCES

- Beare, G., 2012, Alice B(olingbroke) Woodward (1862-1951). the yellow nineties online, [http://1890s.ca/PDFs/woodward\\_bio.pdf](http://1890s.ca/PDFs/woodward_bio.pdf) (accessed 30 May 2013)
- Guyot, A., 1878, Memoir of Louis Agassiz 1807–1873: Washington, National Academy, April, p. 39–73.
- Irmscher, C., 2013, Louis Agassiz, creator of American Science: Boston, New York, Houghton Mifflin Harcourt, 434 p.
- Kölbl-Ebert, M., 2007, The role of British and German women in early 19th-century geology: a comparative assessment, *in* Burek, C.V., and Higgs, B., eds., The role of women in the history of geology: Geological Society, London Special Publication 281, p. 155–163.
- Marché, T., 1991, Orra White Hitchcock: A Virtuous Woman: Reston, VA, National Art Education Association, 23 p.
- Ogilvie, M. B., and Harvey, J. D., 2000, The Biographical Dictionary of Women in Science: Pioneering Lives from Ancient Times to the Mid-20th Century: London, Taylor & Francis, 1499 p.
- Find more on University of Stuttgart Database of Scientific Illustrators sculpture/artists website: <https://dsi.hi.uni-stuttgart.de/index.php?function=search&tablename=dsi>.
